# Supplementary material
Source: publisher site journal article supplement (https://www.spandidos-publications.com/8630/downloadSupplementary)
Supplement: Supplementary file 1 [file downloadSupplementary]

Table SI. Similarities and differences among MTA1, MTA2 and MTA3.

| <b>Comparison item</b>   | <b>MTA1</b>                                                                    | <b>MTA2</b>                                                                                             | <b>MTA3</b>                                                                                    | <b>(Refs.)</b> |
|--------------------------|--------------------------------------------------------------------------------|---------------------------------------------------------------------------------------------------------|------------------------------------------------------------------------------------------------|----------------|
| Chromosomal localization | 14q32.3                                                                        | 11q12–q13.1                                                                                             | 2p21                                                                                           | (10)           |
| Molecular weight, kDa    | ~80                                                                            | ~70                                                                                                     | ~65                                                                                            | (9)            |
| Conserved domains        | Contains BAH, ELM2 and SANT domains                                            | Contains BAH, ELM2, SANT and an atypical GATA zinc finger domain                                        | Highly homologous structure to MTA1/2, with distinct C-terminal sequences                      | (10,11,21)     |
| Normal tissue expression | Broad expression in most tissues                                               | High expression in testis, brain, heart, lung, liver and kidney                                         | -                                                                                              | (39-41)        |
| Physiological functions  | -                                                                              | Maintains intestinal lineage stability, sperm maturation, B-cell development and stem cell pluripotency | Cooperates with MTA2 to maintain stem cell pluripotency and repress mesodermal differentiation | (10,14)        |
| Expression in cancer     | Frequently overexpressed in most tumors                                        | Predominantly amplified (rarely mutated), with overexpression in most solid tumors                      | Expression often decreases with tumor progression                                              | (13,18-20)     |
| Family cross-regulation  | Overexpression reduces MTA2/MTA3 protein levels without affecting mRNA         | Degraded by MTA1 in breast cancer; forms an antagonistic pair with MTA1                                 | Downregulated by MTA1 overexpression                                                           | (17-19)        |
| Core oncogenic functions | Promotes tumor progression; context-dependent anti-metastatic effects reported | A master driver of metastasis, EMT, drug resistance and epigenetic silencing                            | Regulates epithelial cell state via Snail-related pathways; context-dependent EMT regulation   | (13-16)        |

BAH, bromo-adjacent homology; ELM2, Egl-27 and MTA1 homology 2; EMT, epithelial-mesenchymal transition; MTA, metastasis-associated; SANT, Swi3/Ada2/N Cor/TFIIIB domain.
